# Supplementary material for: A novel all solid-state asymmetric supercapacitor with superior electrochemical performance in a wide temperature range using a hydroquinone modified graphene xerogel as the cathode and N-doped Ti3C2Tx as the anode
Source: Royal Society of Chemistry journal article supplement (doi:10.1039/c9ta09447d), 2019-10-11
Supplement: c9ta09447d1.pdf [file c9ta09447d1.pdf]

## Electronic supplementary information

### **A novel all-solid-state asymmetric supercapacitor with superior electrochemical performance in a wide temperature range by using hydroquinone modified graphene xerogel as cathode and N-doped $\text{Ti}_3\text{C}_2\text{T}_x$ as anode**

*Qimeng Sun,<sup>a</sup> Tao He<sup>b</sup> and Yueming Li<sup>\*\*a</sup>*

- a. State Key Laboratory of Metastable Materials Science and Technology, College of Materials Science and Engineering, Yanshan University, Qinhuangdao 066004, China
- b. Shanghai Advanced Research Institute, Chinese Academy of Sciences, Shanghai, China

---

\* Corresponding author: Prof. Yueming Li, Tel: 86-335-807-4631, E-mail: liyueming@ysu.edu.cn

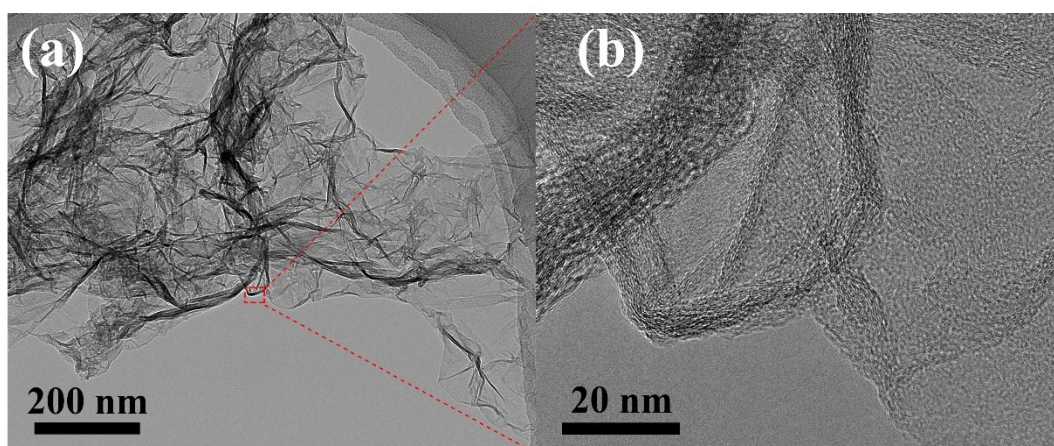

**Figure S1** (a) TEM image and (b) HRTEM image of the HG2.

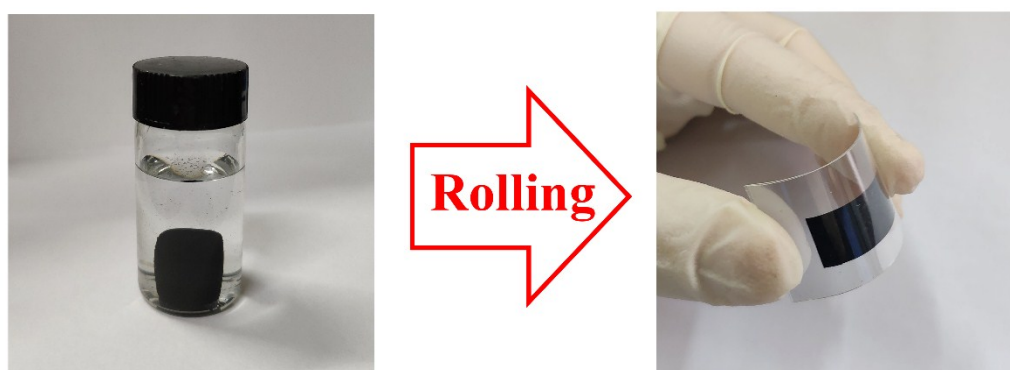

**Figure S2:** Prepared graphene hydrogel and graphene electrode prepared by rolling.

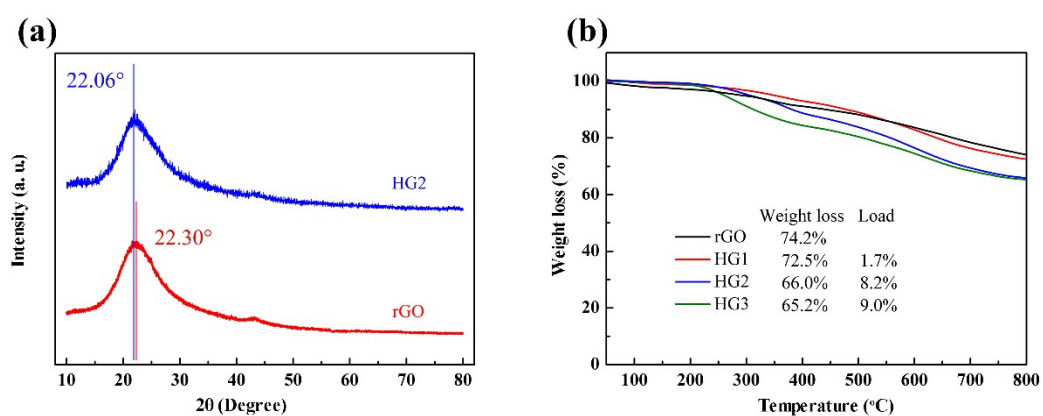

**Figure S3** (a) XRD patterns of rGO and HG2. (b) TGA curves of rGO and HG2 samples in Ar at a heating rate of  $5\text{ }^{\circ}\text{C min}^{-1}$ .

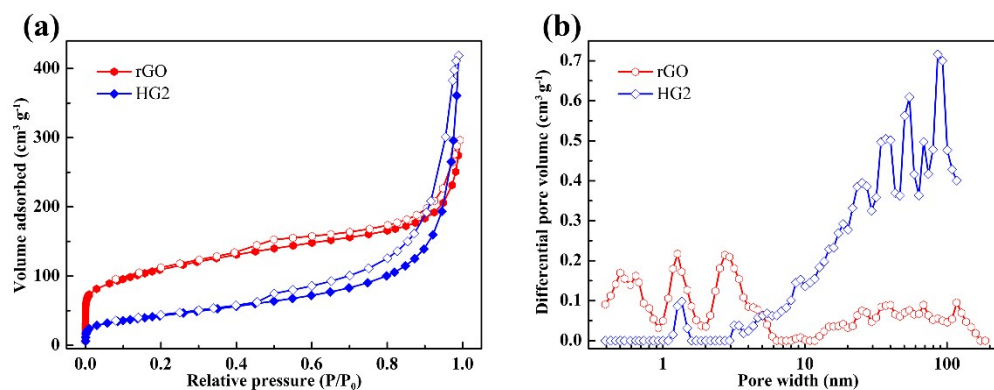

**Figure S4** Nitrogen adsorption-desorption isotherm (a), and pore width distribution (b) for rGO and HG2.

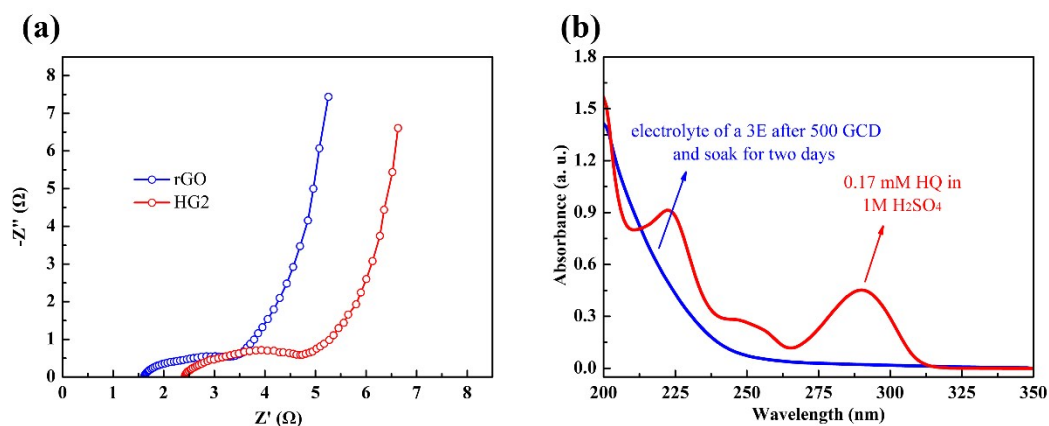

**Figure S5:** (a) Nyquist plots of rGO and HG2 electrodes at room temperature. (b) UV-vis absorption spectra of a 0.17 mM HQ in 1 M H<sub>2</sub>SO<sub>4</sub> solution and the electrolyte which was after 500s CD at low current density of 2 A g<sup>-1</sup> and soak for two days in the three-electrode device.

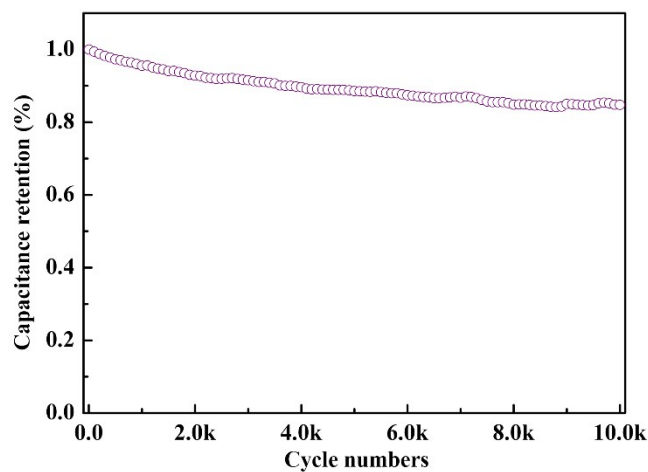

**Figure S6** Cycling stability at 20 A g<sup>-1</sup> of the HG2 electrode at room temperature.

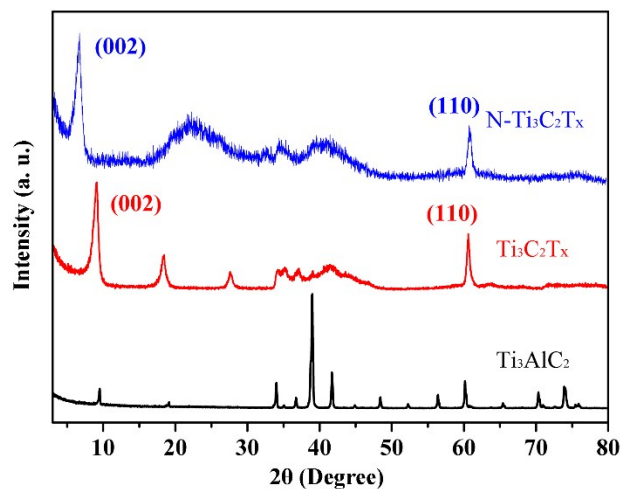

**Figure S7** XRD patterns of  $\text{Ti}_3\text{AlC}_2$ ,  $\text{Ti}_3\text{C}_2\text{T}_x$  and  $\text{N-Ti}_3\text{C}_2\text{T}_x$ .

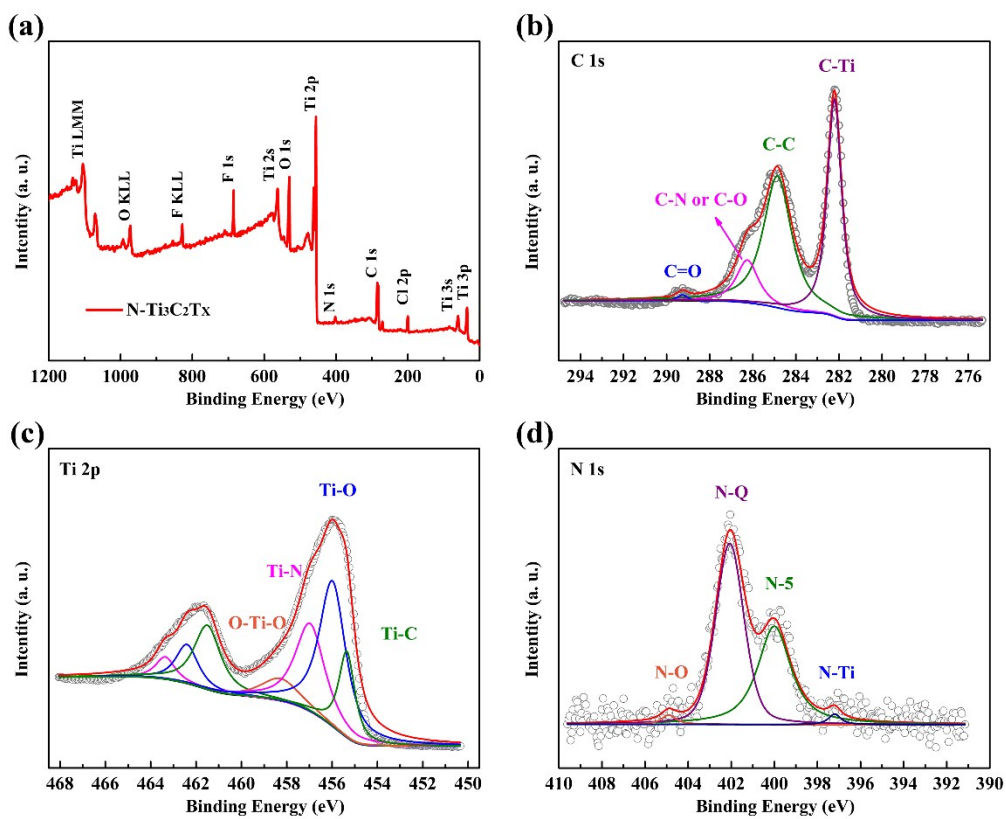

**Figure S8** (a) XPS spectrum for  $\text{N-Ti}_3\text{C}_2\text{T}_x$ . (B) High-resolution XPS spectra of C 1s (b), Ti 2p (c) and N 1s (d) for  $\text{N-Ti}_3\text{C}_2\text{T}_x$ .

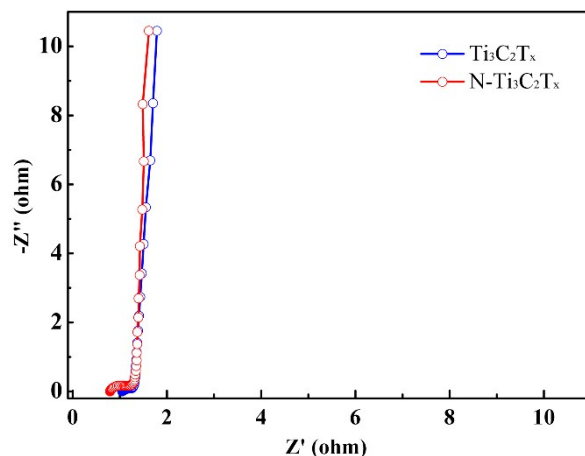

**Figure S9** Nyquist plots of  $\text{Ti}_3\text{C}_2\text{T}_x$  and  $\text{N-Ti}_3\text{C}_2\text{T}_x$  at room temperature.

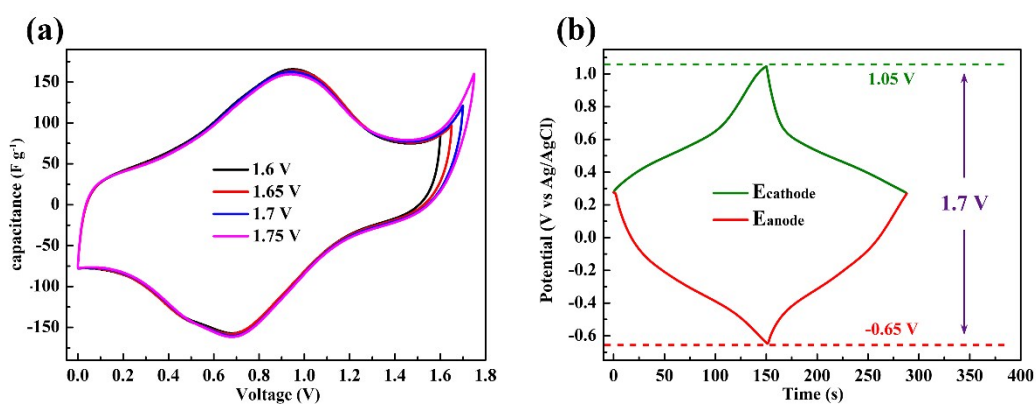

**Figure S10** (a) CV curves under different voltage windows for asymmetric device. (b) In situ potential-time curves of cathode and anode at  $1\text{A g}^{-1}$  at room temperature

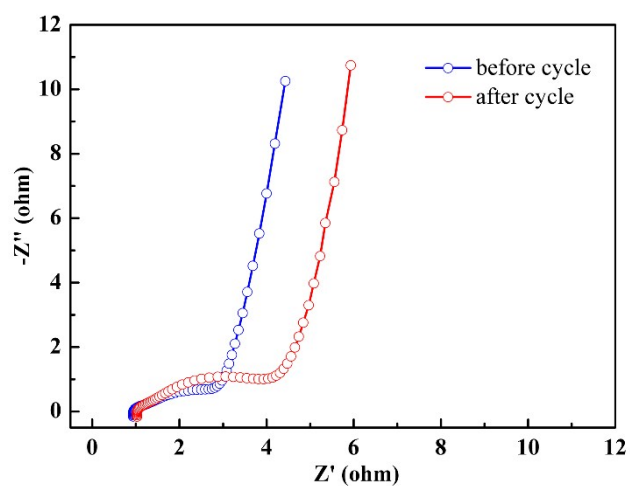

**Figure S11** Nyquist plots for asymmetric device which is before and after the charge/discharge cycle at room temperature.

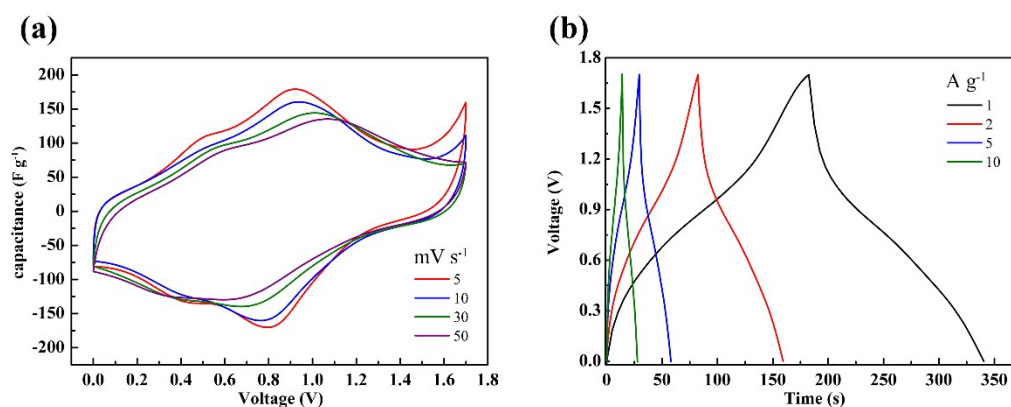

**Figure S12** (a) CVs of the asymmetric device in gel electrolyte at different scan rate. (b) CDs of the asymmetric device in gel electrolyte at different current density at room temperature.

**Table S1** Comparison of the electrochemical performance of supercapacitor recently reported at room temperature.

| Materials                                                                                                                                                     | Electrolyte                         | Voltage window | Capacitance of cell (F g <sup>-1</sup> ) | Current density       | Energy density (Wh kg <sup>-1</sup> ) | Power density (W kg <sup>-1</sup> ) | Cycle numbers | Capacity retention | Ref  |
|---------------------------------------------------------------------------------------------------------------------------------------------------------------|-------------------------------------|----------------|------------------------------------------|-----------------------|---------------------------------------|-------------------------------------|---------------|--------------------|------|
| Ti <sub>3</sub> C <sub>2</sub> T <sub>x</sub> /rGO                                                                                                            | 1 M H <sub>2</sub> SO <sub>4</sub>  | 1.1 V          | 48                                       | 2 mV s <sup>-1</sup>  | 8                                     | 50                                  | 1000          | 76%                | [1]  |
| Ti <sub>3</sub> C <sub>2</sub> T <sub>x</sub> @NC//Ti <sub>3</sub> C <sub>2</sub> T <sub>x</sub> @NC                                                          | 1 M H <sub>2</sub> SO <sub>4</sub>  | 1.1 V          | 176.9                                    | 1 A g <sup>-1</sup>   | 29.7                                  | 582.3                               | 5000          | 91.9%              | [2]  |
| G@MnO <sub>2</sub> /porous graphene                                                                                                                           | 1 M Na <sub>2</sub> SO <sub>4</sub> | 2 V            | 56                                       | 0.5 A g <sup>-1</sup> | 30.6                                  | 197                                 | 10000         | 91.5%              | [3]  |
| Ti <sub>3</sub> C <sub>2</sub> T <sub>x</sub> -Bi <sub>2</sub> O <sub>3</sub> //Ti <sub>3</sub> C <sub>2</sub> T <sub>x</sub> -Bi <sub>2</sub> O <sub>3</sub> | 1 M KOH                             | 1.2 V          | 76                                       | 0.5 A g <sup>-1</sup> | 15.2                                  | 567                                 | 5000          | 85%                | [4]  |
| Ti <sub>3</sub> C <sub>2</sub> T <sub>x</sub> //PEDOT@rGO                                                                                                     | 3 M H <sub>2</sub> SO <sub>4</sub>  | 1.4 V          | 47                                       | 5 mV s <sup>-1</sup>  | 13                                    | 170                                 | 10000         | 80%                | [5]  |
| Ti <sub>3</sub> C <sub>2</sub> T <sub>x</sub> //PPy@rGO                                                                                                       | 3 M H <sub>2</sub> SO <sub>4</sub>  | 1.4 V          | 59                                       | 5 mV s <sup>-1</sup>  | 16                                    | 200                                 | 20000         | 75%                |      |
| Ti <sub>3</sub> C <sub>2</sub> T <sub>x</sub> //PANI@rGO                                                                                                      | 3 M H <sub>2</sub> SO <sub>4</sub>  | 1.45 V         | 57                                       | 5 mV s <sup>-1</sup>  | 17                                    | 200                                 | 20000         | 88.42%             |      |
| Ti <sub>3</sub> C <sub>2</sub> //TC-9                                                                                                                         | 1 M KOH                             | 1.5 V          | 49.3                                     | 1 A g <sup>-1</sup>   | 15.4                                  | 750.2                               | 5000          | 82.4%              | [6]  |
| Ti <sub>3</sub> C <sub>2</sub> T <sub>x</sub> //RuO <sub>2</sub>                                                                                              | 1 M H <sub>2</sub> SO <sub>4</sub>  | 1.5 V          | 93                                       | 5 mV s <sup>-1</sup>  | 29                                    | 3800                                | 20000         | 86%                | [7]  |
|                                                                                                                                                               |                                     |                |                                          |                       | 24                                    | 26000                               |               |                    |      |
| PPy/rGO//NCs                                                                                                                                                  | 3 M LiCl                            | 1.6 V          | 43.2                                     | 20 mV s <sup>-1</sup> | 15.8                                  | 140                                 | 10000         | 88.7%              | [8]  |
| MnCo <sub>2</sub> S <sub>4</sub> //rGO                                                                                                                        | 3 M KOH                             | 1.6 V          | 88                                       | 1 A g <sup>-1</sup>   | 31.3                                  | 800                                 | 5000          | 89%                | [9]  |
| 400-KOH-Ti <sub>3</sub> C <sub>2</sub> //400-KOH-Ti <sub>3</sub> C <sub>2</sub>                                                                               | 1 M H <sub>2</sub> SO <sub>4</sub>  | 1.6 V          | 66.4                                     | 1 A g <sup>-1</sup>   | 23.6                                  | 300                                 | 5000          | 90.4%              | [10] |
| Ti <sub>3</sub> C <sub>2</sub> T <sub>x</sub> /rGO                                                                                                            | 3 M H <sub>2</sub> SO <sub>4</sub>  | 1.8 V          | 76.5                                     | 1 A g <sup>-1</sup>   | 34.4                                  | 1000                                | 10000         | —                  | [11] |
|                                                                                                                                                               | +50 mM LiBr                         |                |                                          |                       | 23.7                                  | 22500                               |               |                    |      |
| N-Ti <sub>3</sub> C <sub>2</sub> T <sub>x</sub> //HG2                                                                                                         | 1 M H <sub>2</sub> SO <sub>4</sub>  | 1.7 V          | 102                                      | 0.5 A g <sup>-1</sup> | 41                                    | 425                                 | 18000         | 83%                | a    |
|                                                                                                                                                               |                                     |                |                                          |                       | 26.7                                  | 42500                               |               |                    | a    |

a This work

## References

- [1] A.M. Navarro-Suárez, K.L. Van Aken, T. Mathis, T. Makaryan, J. Yan, J. Carretero-González, T. Rojo, Y. Gogotsi, Development of asymmetric supercapacitors with titanium carbide-reduced graphene oxide couples as electrodes, *Electrochimica Acta*, 259 (2018) 752-761.
- [2] T. Zhao, J. Zhang, Z. Du, Y. Liu, G. Zhou, J. Wang, Dopamine-derived N-doped carbon decorated titanium carbide composite for enhanced supercapacitive performance, *Electrochimica Acta*, 254 (2017) 308-319.
- [3] L. Wang, Y. Ouyang, X. Jiao, X. Xia, W. Lei, Q. Hao, Polyaniline-assisted growth of MnO<sub>2</sub> ultrathin nanosheets on graphene and porous graphene for asymmetric supercapacitor with enhanced energy density, *Chemical Engineering Journal*, 334 (2018) 1-9.
- [4] Q.X. Xia, N.M. Shinde, J.M. Yun, T. Zhang, R.S. Mane, S. Mathur, K.H. Kim, Bismuth Oxychloride/MXene symmetric supercapacitor with high volumetric energy density, *Electrochimica Acta*, 271 (2018) 351-360.
- [5] M. Boota, Y. Gogotsi, MXene-Conducting Polymer Asymmetric Pseudocapacitors, *Advanced Energy Materials*, 9 (2019) 1802917.
- [6] Z. Pan, F. Cao, X. Hu, X. Ji, A facile method for synthesizing CuS decorated Ti<sub>3</sub>C<sub>2</sub> MXene with enhanced performance for asymmetric supercapacitors, *Journal of Materials Chemistry A*, 7 (2019) 8984-8992.
- [7] Q. Jiang, N. Kurra, M. Alhabeb, Y. Gogotsi, H.N. Alshareef, All Pseudocapacitive MXene-RuO<sub>2</sub> Asymmetric Supercapacitors, *Advanced Energy Materials*, 8 (2018) 1703043.
- [8] J. Zhu, T. Feng, X. Du, J. Wang, J. Hu, L. Wei, High performance asymmetric supercapacitor based on polypyrrole/graphene composite and its derived nitrogen-doped carbon nano-sheets, *Journal of Power Sources*, 346 (2017) 120-127.
- [9] S. Liu, S.C. Jun, Hierarchical manganese cobalt sulfide core-shell nanostructures for high-performance asymmetric supercapacitors, *Journal of Power Sources*, 342 (2017) 629-637.
- [10] J. Li, X. Yuan, C. Lin, Y. Yang, L. Xu, X. Du, J. Xie, J. Lin, J. Sun, Achieving High Pseudocapacitance of 2D Titanium Carbide (MXene) by Cation Intercalation and Surface Modification, *Advanced Energy Materials*, 7 (2017) 1602725.
- [11] S. Wang, X. Zhao, X. Yan, Z. Xiao, C. Liu, Y. Zhang, X. Yang, Regulating Fast Anionic Redox for High-Voltage Aqueous Hydrogen-Ion-based Energy Storage, *Angewandte Chemie*, 58 (2019) 205-210.
